# Supplementary material for: Optimization and Reproducibility of Aortic Valve 18F-Fluoride Positron Emission Tomography in Patients With Aortic Stenosis
Source: PubMed Central journal article supplement (PMC5068186; doi:10.1161/circimaging.116.005131), 2016-10-18

## SUPPLEMENTAL MATERIAL

**Table 1. Full list of inclusion and exclusion criteria**

---

|                           |                                                                                                                                                                                                                                                                                                                                                                                                                                                                                                                                                                                                                                                             |
|---------------------------|-------------------------------------------------------------------------------------------------------------------------------------------------------------------------------------------------------------------------------------------------------------------------------------------------------------------------------------------------------------------------------------------------------------------------------------------------------------------------------------------------------------------------------------------------------------------------------------------------------------------------------------------------------------|
| <b>Inclusion Criteria</b> | Age >50 years<br>Peak aortic jet velocity of >2.5 m/s on Doppler echocardiography<br>Grade 2-4 calcification of the aortic valve on echocardiography                                                                                                                                                                                                                                                                                                                                                                                                                                                                                                        |
| <b>Exclusion Criteria</b> | Women of childbearing potential who have experienced menarche, are premenopausal,<br>Women who have not been sterilized or who are currently pregnant.<br>Women who are breastfeeding<br>Renal failure (estimated glomerular filtration rate of <30 mL/min)<br>Inability to undergo scanning<br>Allergy or contraindication to iodinated contrast<br>Inability or unwilling to give informed consent<br>Likelihood of non-compliance to treatment allocation or study protocol.<br>Anticipated or planned aortic valve surgery in the next 6 months,<br>Life expectancy less than 2 years,<br>Treatment for osteoporosis with bisphosphonates or denosumab. |

---

---

Known allergy or intolerance to alendronate or denosumab, or any of their excipients

Abnormalities of the oesophagus or conditions, which delay oesophageal/gastric emptying.

Inability to sit or stand for at least 30 minutes.

Hypocalcaemia

Regular calcium supplementation

Dental extraction within 6 months

Long term corticosteroid use.

History of osteonecrosis of the jaw

Poor dental hygiene

Major or untreated cancers

---

**Figure 1.** Linear regression analysis of scan-rescan reproducibility versus calcium burden. The mean difference between  $^{18}\text{F}$ -Fluoride TBRMDSmean measures for the 15 scan pairs is plotted against the log-transformed Computed Tomography calcium score ( $\log_{10}$  Agatston Units). No proportional bias is observed.

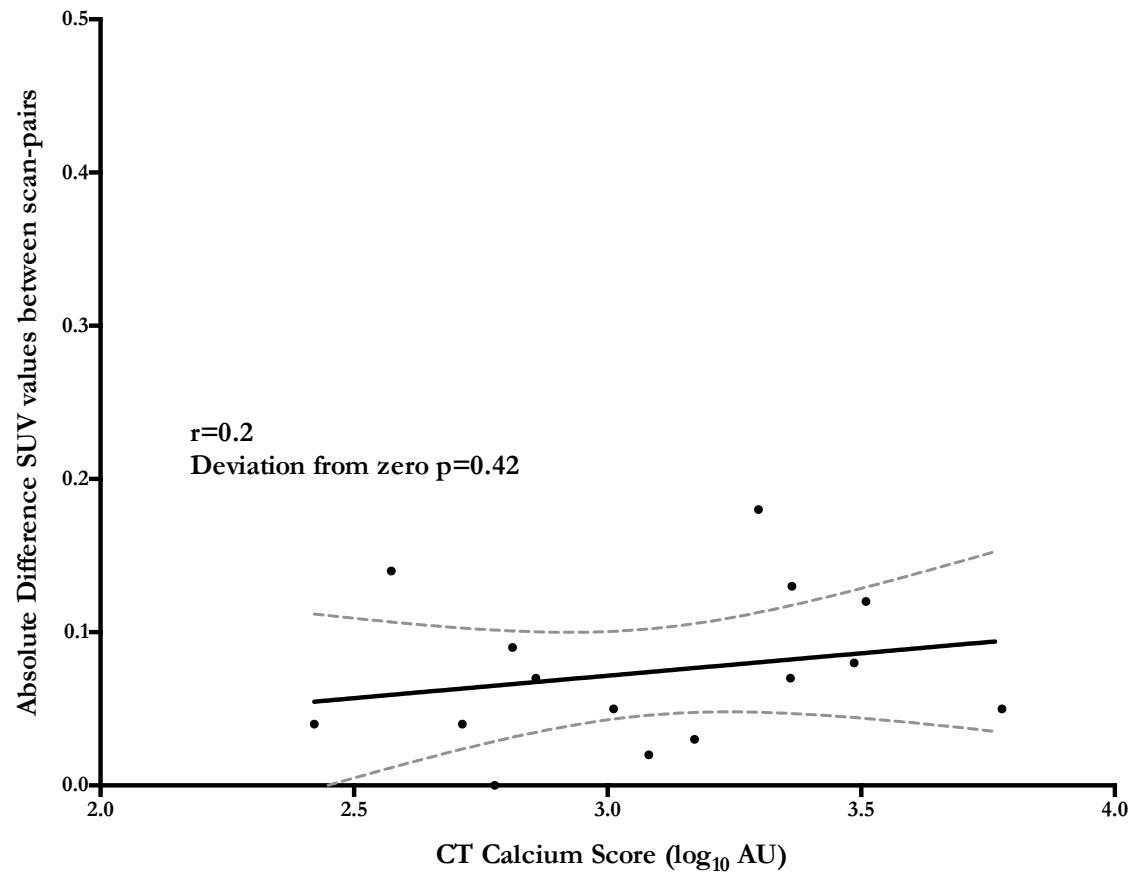

Supplement: hci-9-e005131-s001.pdf [file hci-9-e005131-s001.pdf]
